# Supplementary material for: Synthesis of IrCu/Co3O4 hybrid nanostructures and their enhanced catalytic properties toward oxygen evolution reaction under both acidic and alkaline conditions
Source: Royal Society of Chemistry journal article supplement (doi:10.1039/d4dt03079f), 2025-01-01
Supplement: d4dt03079f1.pdf [file d4dt03079f1.pdf]

## Supporting Information

**Synthesis of IrCu/Co<sub>3</sub>O<sub>4</sub> hybrid nanostructures and their enhanced catalytic properties  
toward oxygen evolution reaction under both acidic and alkaline conditions**

Xiaomei Xu<sup>1</sup>, Taekyung Yu<sup>1</sup>, \*

<sup>1</sup> Department of Chemical Engineering, Integrated Engineering Major, College of Engineering,  
Kyung Hee University, Yongin, 17104, Republic of Korea

\*Corresponding author

E-mail addresses: [tkyu@khu.ac.kr](mailto:tkyu@khu.ac.kr) (T. Yu)

## 1. Electrochemical Characterization.

All electrochemical measurements were carried out at ambient temperature and pressure with an electrochemical workstation (CHI760E, Chenhua Shanghai). A three-electrode cell configuration was employed with a working electrode of glassy carbon with a working area of 0.07 cm<sup>2</sup>, a counter electrode of graphite rod. The Hg/HgO (Re-61AP, ALS), and Ag/AgCl were the reference electrodes under the alkaline and acidic conditions, respectively. Electrocatalyst inks were prepared by dispersing 2 mg of catalyst into a solution containing 45  $\mu$ L of 5% Nafion solution (Du Pont) and 555  $\mu$ L of ultrapure water-ethanol solution with equal volumes of water and ethanol, followed by ultrasonication for 0.5 h. Before each experiment, the glassy carbon electrode was polished with 0.05  $\mu$ m alumina for 0.2 h until it achieved a mirror shine. Then, 3.4  $\mu$ L of the catalyst solution was transferred onto a glassy carbon electrode and fully dried at 25  $^{\circ}$ C.

The overpotential ( $\eta$ ) was calculated by  $\eta = E(\text{vs. RHE}) - 1.23 \text{ V}$  for OER. In addition, the 90% iR correction was done for the polarization curves. Electrochemical impedance spectroscopy (EIS) analysis was conducted at 1.50-1.65 V vs. RHE in the frequency range from 100 k to 0.01 Hz and the EIS plots were fitted using ZView software. To compare the electrochemically active surface area (ECSA) of each catalyst, the double-layer capacitance ( $C_{dl}$ ) was measured in 1.0 M KOH (0.5 M H<sub>2</sub>SO<sub>4</sub>) in the non-Faradaic region at the scan rates of 20, 40, 60, 80, and 100 mV $\cdot$ s<sup>-1</sup>.

$$C_{dl} = (\Delta j = (j_a - j_c))/2 \quad (1)$$

Turnover Frequency (TOF) is a measure of catalytic activity. It refers to the number of times a catalytic site converts a substrate into a product per unit time. It's a critical parameter for evaluating the efficiency of catalysts in chemical reactions<sup>1</sup>.

$$\text{TOF} = I/4nF \quad (2)$$

where I is the current density at a definite overpotential; F is the Faraday's constant (96,485 C $\cdot$ mol<sup>-1</sup>); and n, the number of moles of the electrochemical materials on the electrode. The factors 4 are based on the assumption that four electrons are necessary to form on oxygen molecules<sup>2</sup>.

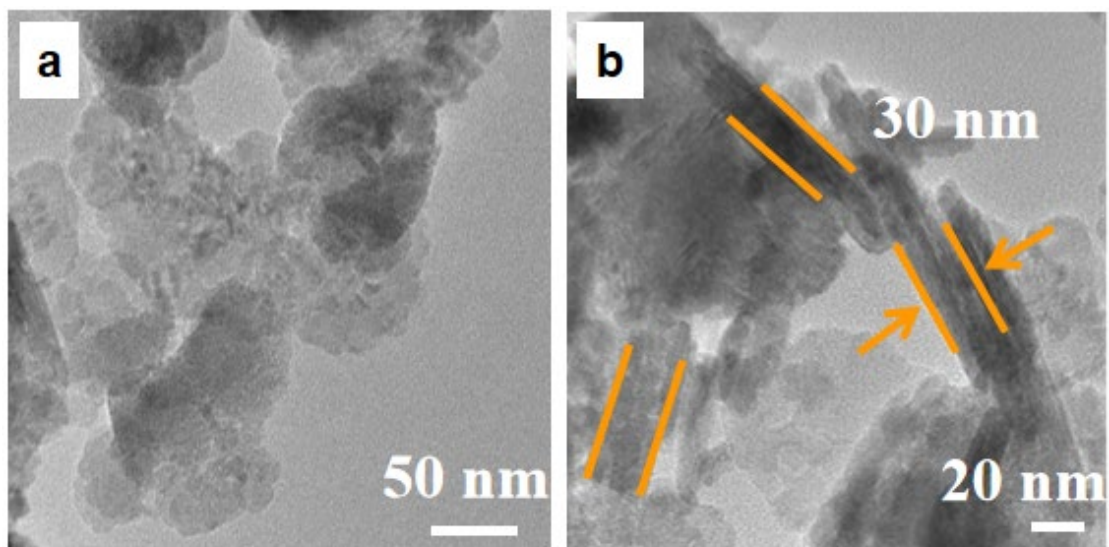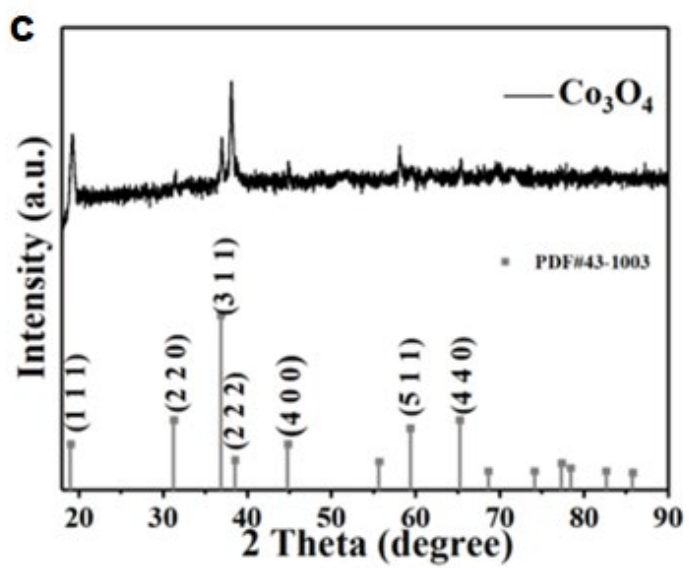

Fig. S1. (a and b) TEM images and (c) XRD patterns of  $\text{Co}_3\text{O}_4$  nanosheets.

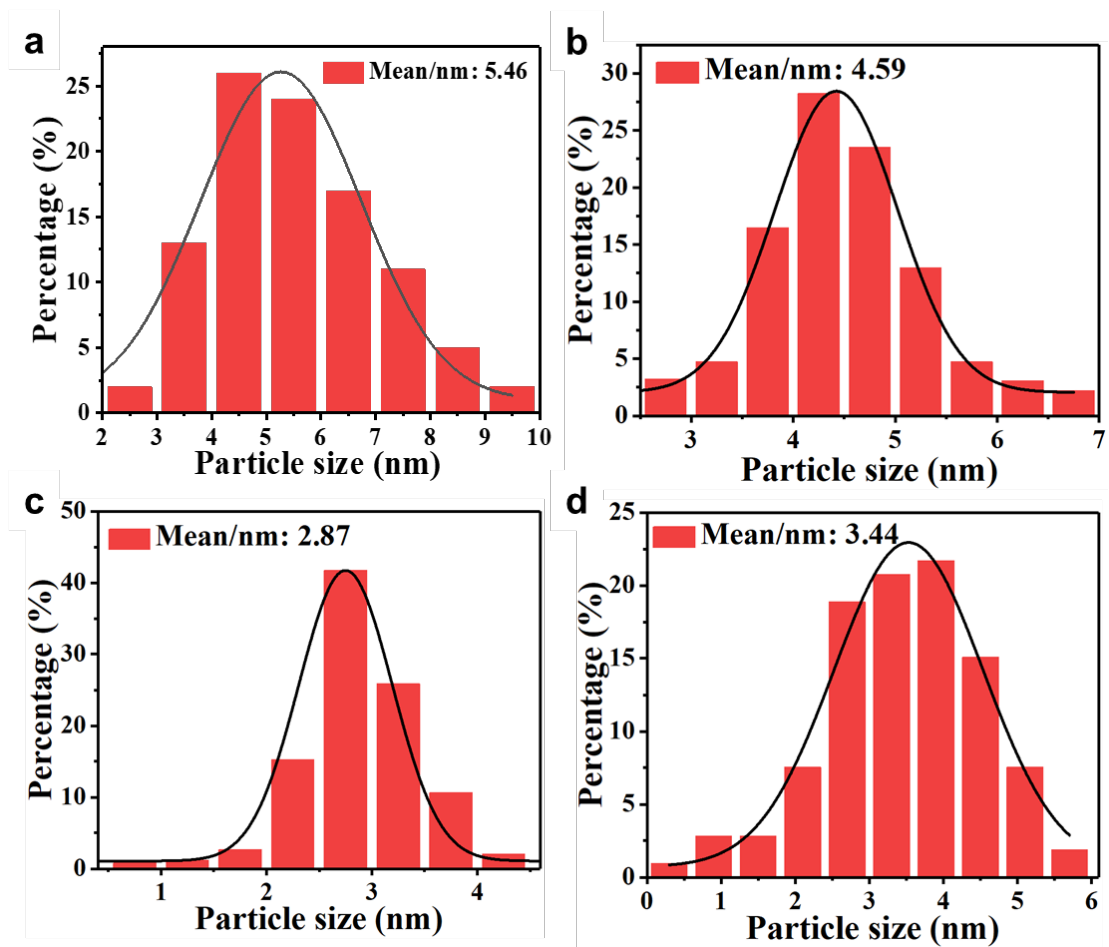

Fig. S2. Size distribution diagrams of the (a) Ir<sub>26</sub>Cu<sub>74</sub> nanoparticles (b) Ir<sub>19</sub>Cu<sub>81</sub>/Co<sub>3</sub>O<sub>4</sub>, (c) Ir<sub>26</sub>Cu<sub>74</sub>/Co<sub>3</sub>O<sub>4</sub>, and (d) Ir<sub>32</sub>Cu<sub>68</sub>/Co<sub>3</sub>O<sub>4</sub>, respectively.

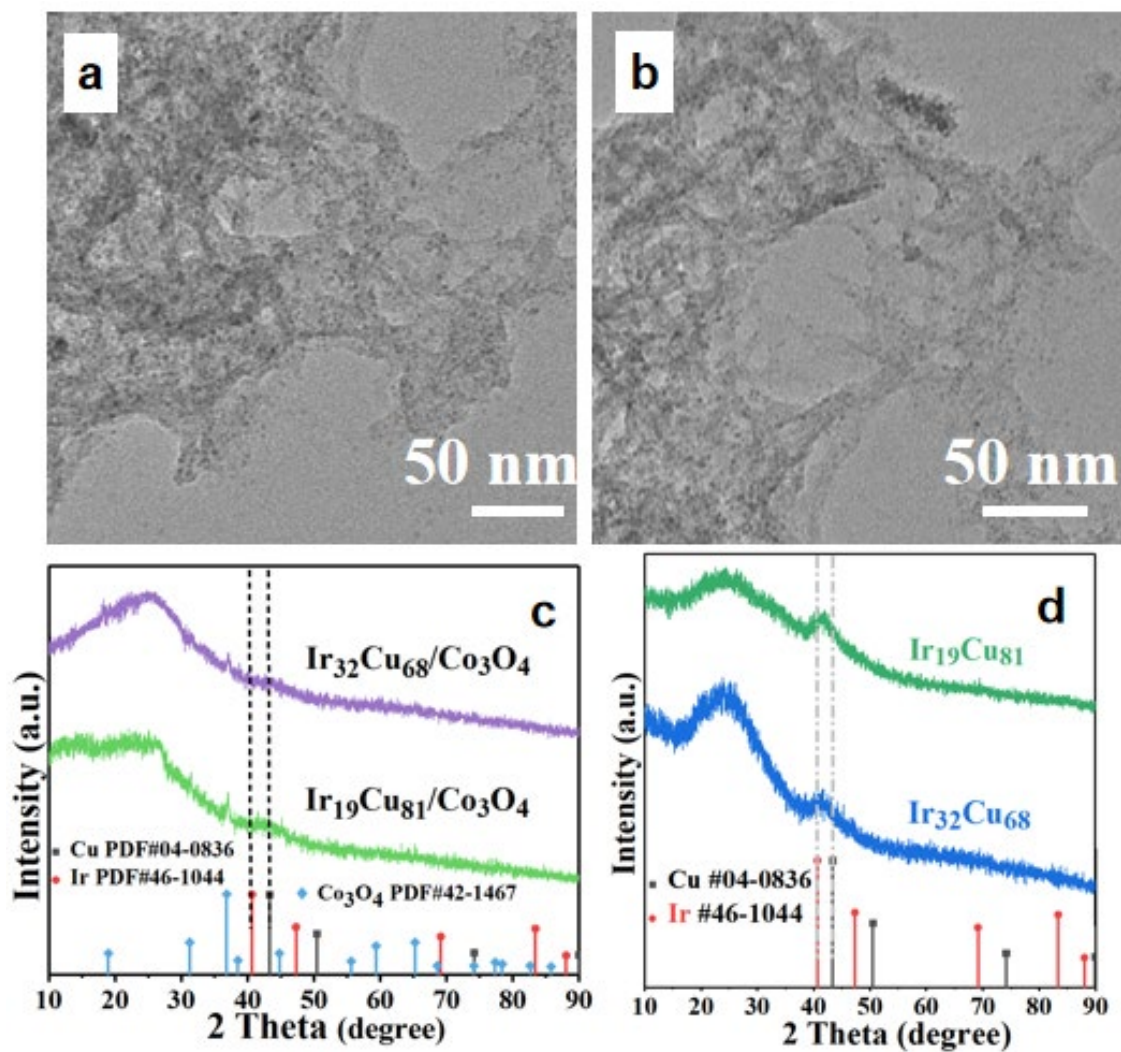

Fig. S3. TEM images of the (a)  $\text{Ir}_{19}\text{Cu}_{81}/\text{Co}_3\text{O}_4$  and (b)  $\text{Ir}_{32}\text{Cu}_{68}/\text{Co}_3\text{O}_4$ . (c) XRD patterns of the  $\text{Ir}_{19}\text{Cu}_{81}/\text{Co}_3\text{O}_4$  and  $\text{Ir}_{32}\text{Cu}_{68}/\text{Co}_3\text{O}_4$ . (d) XRD patterns of the  $\text{Ir}_{19}\text{Cu}_{81}$  and  $\text{Ir}_{32}\text{Cu}_{68}$ .

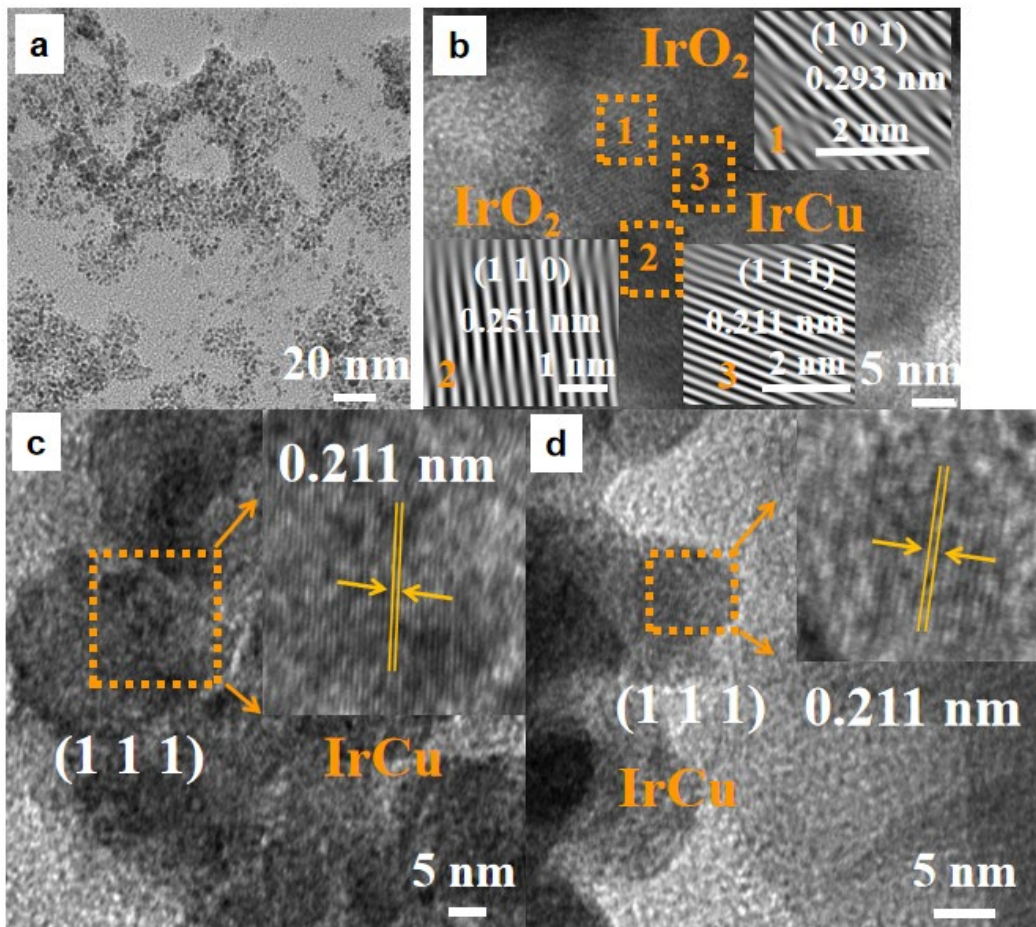

Fig. S4. (a) TEM and (b, c, d) HRTEM images of the  $\text{Ir}_{26}\text{Cu}_{74}$  nanoparticles

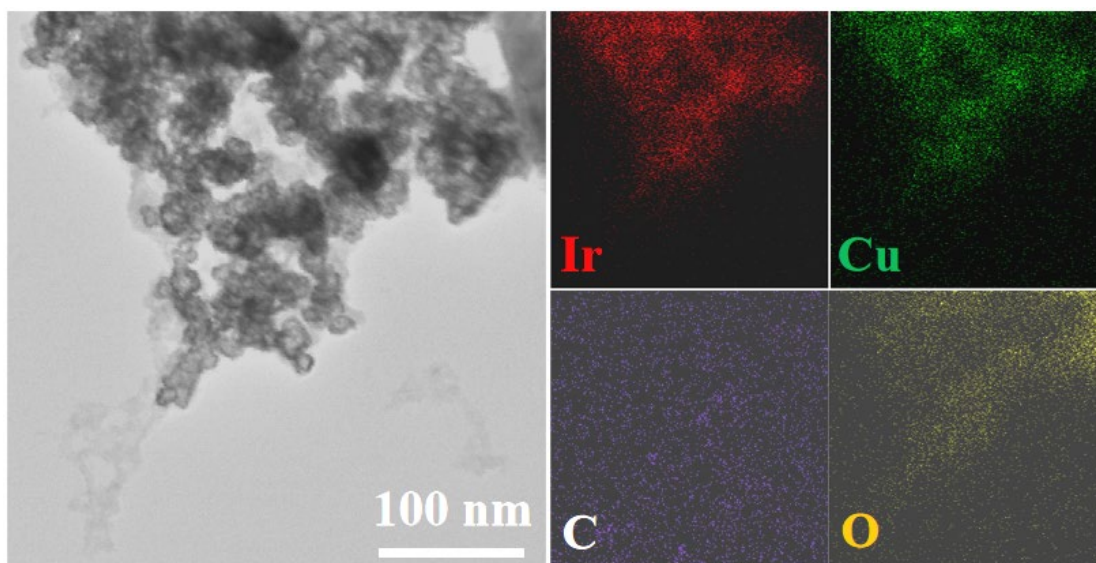

Fig. S5. TEM EDS Mapping images of the  $\text{Ir}_{26}\text{Cu}_{74}$  NPs.

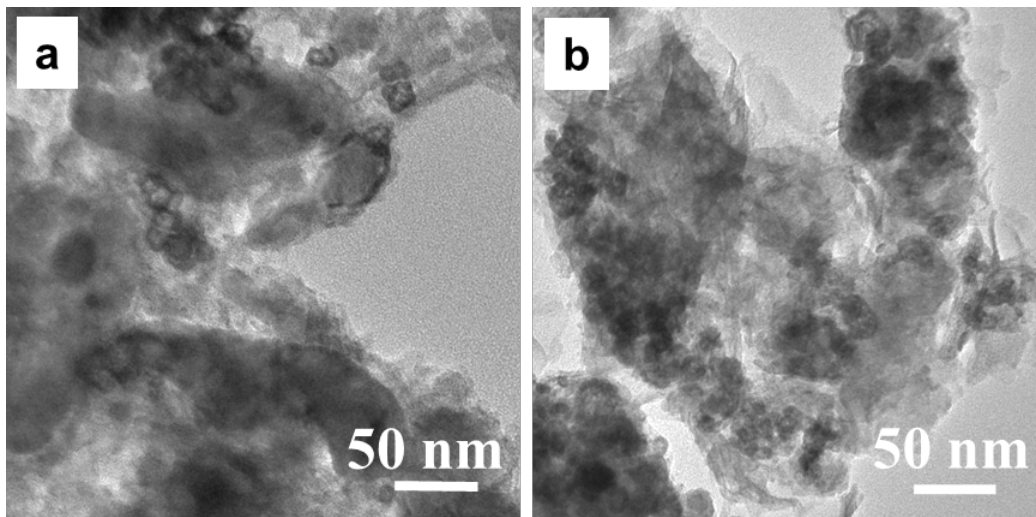

Fig. S6. TEM images of the  $\text{Ir}_{26}\text{Cu}_{74}/\text{Co}_3\text{O}_4$  after OER stability test in (a) 1.0 M KOH and (b) 0.5 M  $\text{H}_2\text{SO}_4$  solutions, respectively.



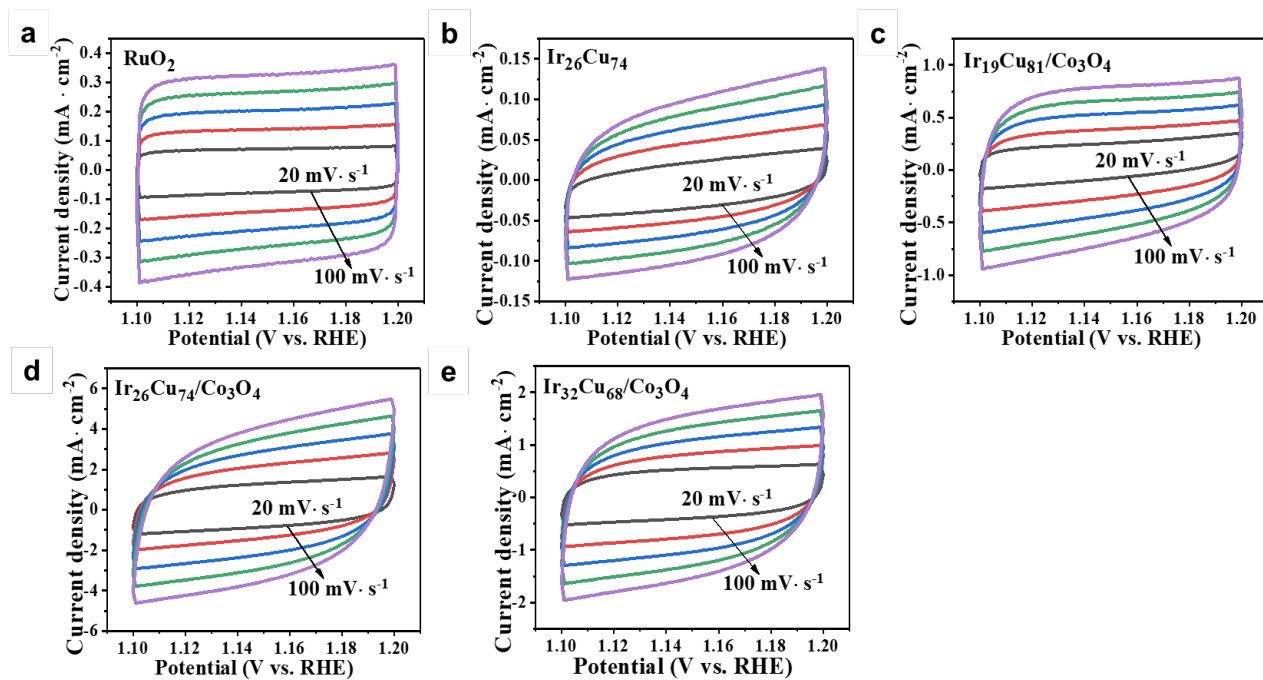

Fig. S7 CV curves of the (a) commercial RuO<sub>2</sub>, (b) Ir<sub>26</sub>Cu<sub>74</sub>, (c) Ir<sub>19</sub>Cu<sub>81</sub>/Co<sub>3</sub>O<sub>4</sub>, (d) Ir<sub>26</sub>Cu<sub>74</sub>/Co<sub>3</sub>O<sub>4</sub>, and (e) Ir<sub>32</sub>Cu<sub>68</sub>/Co<sub>3</sub>O<sub>4</sub> at different scan rates in a 1.0 M KOH solution.

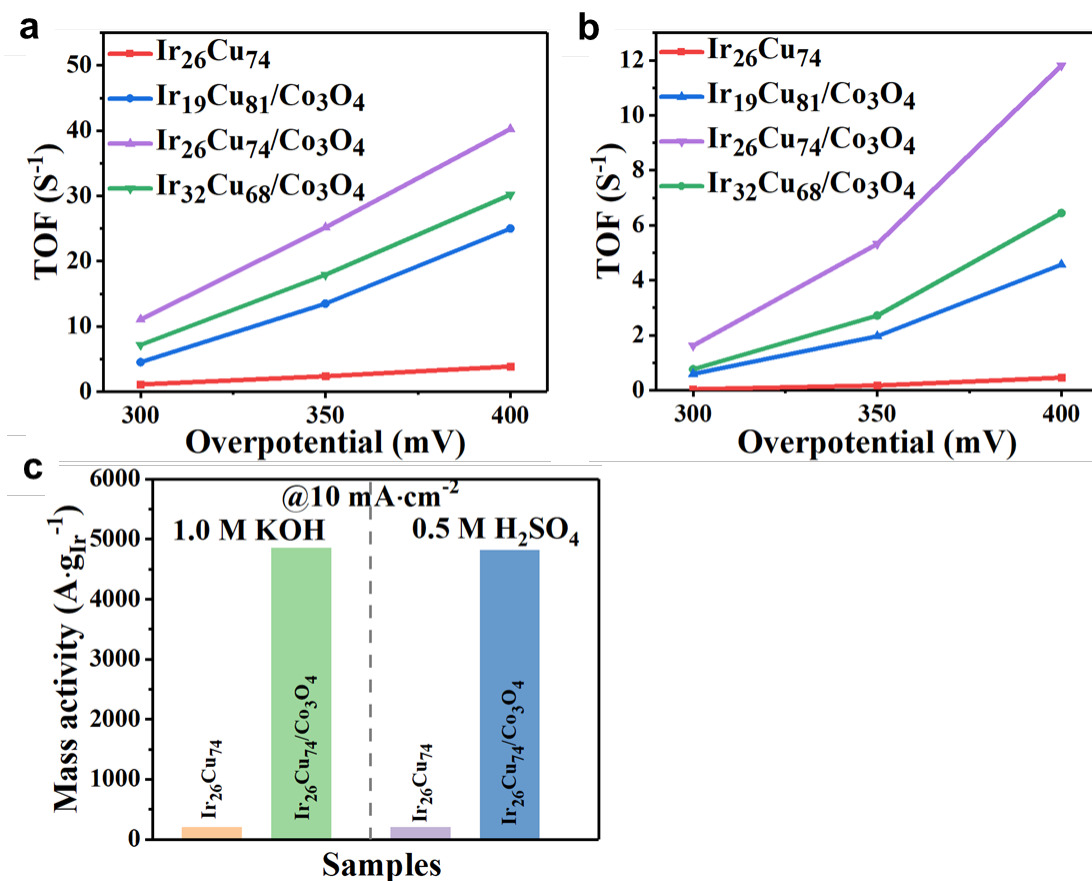

Fig. S8. TOFs of the  $\text{Ir}_{26}\text{Cu}_{74}$ ,  $\text{Ir}_{19}\text{Cu}_{81}/\text{Co}_3\text{O}_4$ ,  $\text{Ir}_{26}\text{Cu}_{74}/\text{Co}_3\text{O}_4$ , and  $\text{Ir}_{32}\text{Cu}_{68}/\text{Co}_3\text{O}_4$  calculated in an (a) alkaline and (b) acidic conditions, respectively. (c) Mass activity of the  $\text{Ir}_{26}\text{Cu}_{74}$  and  $\text{Ir}_{26}\text{Cu}_{74}/\text{Co}_3\text{O}_4$ .

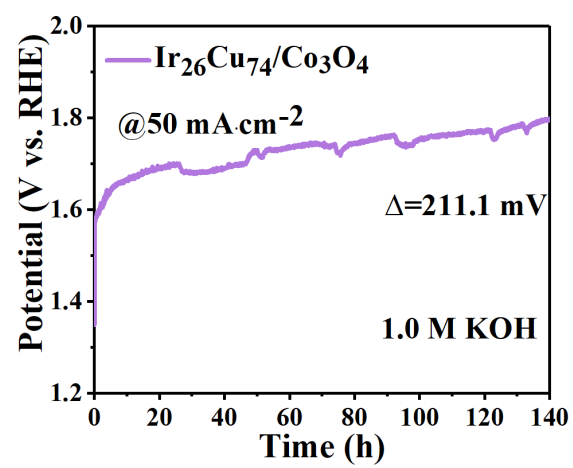

Fig. S9. Durability of the Ir<sub>26</sub>Cu<sub>74</sub>/Co<sub>3</sub>O<sub>4</sub> in a 1.0 M KOH solution.

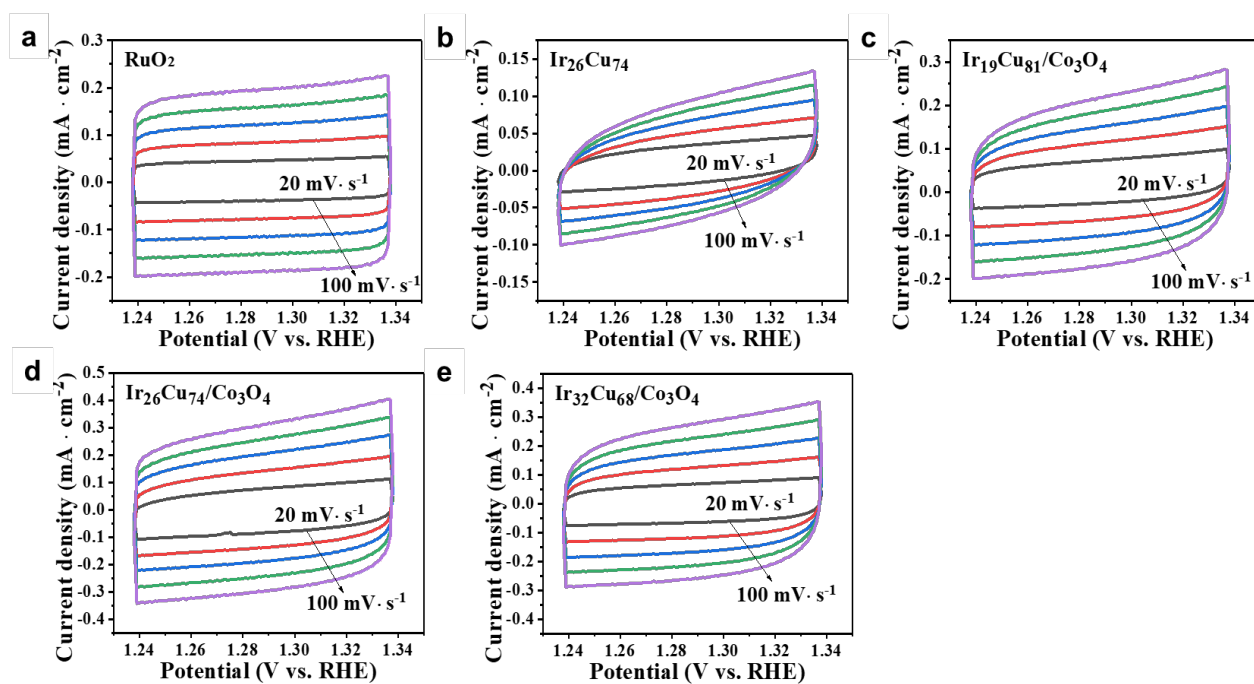

Fig. S10. CV curves of the (a) commercial RuO<sub>2</sub>, (b) Ir<sub>26</sub>Cu<sub>74</sub>, (c) Ir<sub>19</sub>Cu<sub>81</sub>/Co<sub>3</sub>O<sub>4</sub>, (d) Ir<sub>26</sub>Cu<sub>74</sub>/Co<sub>3</sub>O<sub>4</sub>, and (e) Ir<sub>32</sub>Cu<sub>68</sub>/Co<sub>3</sub>O<sub>4</sub> at different scan rates in a 0.5 M H<sub>2</sub>SO<sub>4</sub> solution.

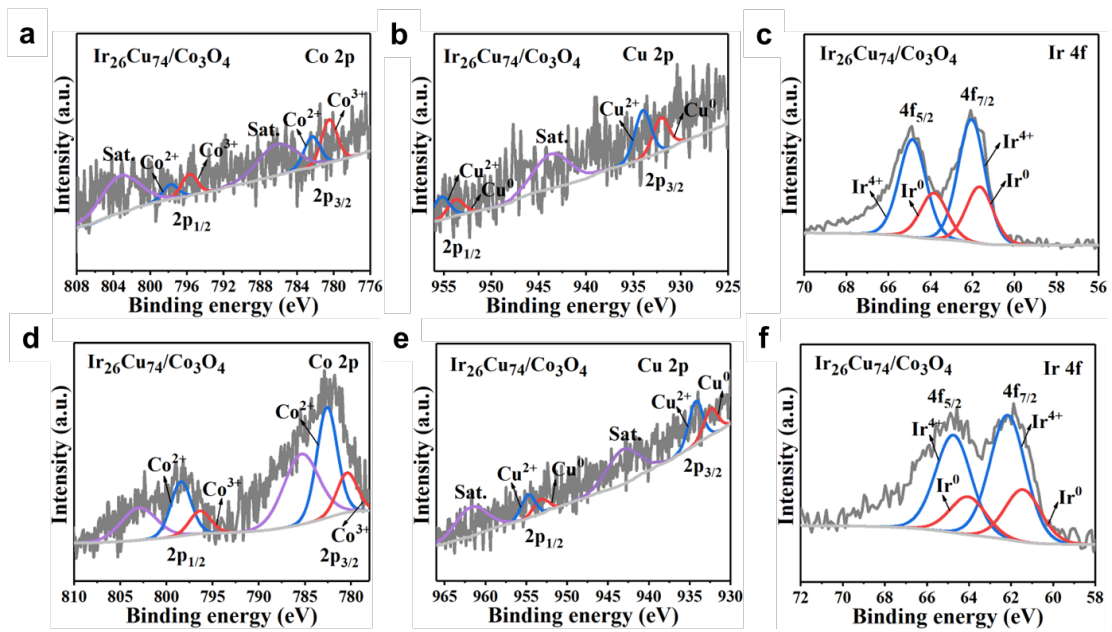

Fig. S11. XPS spectra of the  $\text{Ir}_{26}\text{Cu}_{74}/\text{Co}_3\text{O}_4$  after OER stability test in an (a to c) alkaline and (d to f) acidic conditions, respectively.

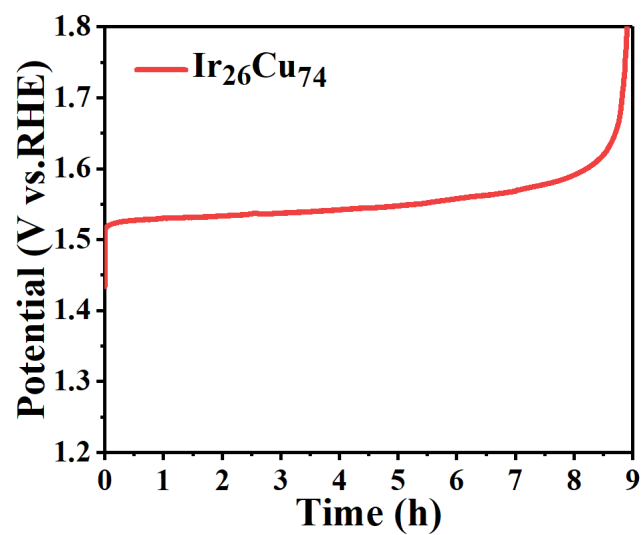

Fig. S12. OER stability test result of the Ir<sub>26</sub>Cu<sub>74</sub> in a 1.0 M KOH solution

Table S1. ICP data of the IrCu/Co<sub>3</sub>O<sub>4</sub>.

| Samples                                                           | C <sub>Ir</sub> (mg/mL) | C <sub>Cu</sub> (mg/mL) | Ir, Cu Mole ration |
|-------------------------------------------------------------------|-------------------------|-------------------------|--------------------|
| Ir <sub>19</sub> Cu <sub>81</sub> /Co <sub>3</sub> O <sub>4</sub> | 0.87                    | 1.23                    | 0.23:1             |
| Ir <sub>26</sub> Cu <sub>74</sub> /Co <sub>3</sub> O <sub>4</sub> | 1.24                    | 1.16                    | 0.36:1             |
| Ir <sub>32</sub> Cu <sub>68</sub> /Co <sub>3</sub> O <sub>4</sub> | 1.50                    | 1.13                    | 0.47:1             |

Table S2. XPS data of the Ir<sub>26</sub>Cu<sub>74</sub>, Ir<sub>26</sub>Cu<sub>74</sub>/Co<sub>3</sub>O<sub>4</sub>, and Co<sub>3</sub>O<sub>4</sub>.

| Samples/<br>Binding Energy (eV) | Ir <sub>26</sub> Cu <sub>74</sub> | Ir <sub>26</sub> Cu <sub>74</sub> /Co <sub>3</sub> O <sub>4</sub> | Co <sub>3</sub> O <sub>4</sub> |
|---------------------------------|-----------------------------------|-------------------------------------------------------------------|--------------------------------|
| Ir <sup>0</sup> 4f 7/2          | 60.78                             | 60.98                                                             | /                              |
| Ir <sup>0</sup> 4f 5/2          | 63.58                             | 63.90                                                             | /                              |
| Ir <sup>4+</sup> 4f 7/2         | 61.87                             | 61.88                                                             | /                              |
| Ir <sup>4+</sup> 4f 5/2         | 64.58                             | 64.78                                                             | /                              |
| Cu <sup>0</sup> 2p 3/2          | 932.18                            | 932.28                                                            | /                              |
| Cu <sup>0</sup> 2p 1/2          | 951.98                            | 952.28                                                            | /                              |
| Cu <sup>2+</sup> 2p 3/2         | 933.98                            | 934.88                                                            | /                              |
| Cu <sup>2+</sup> 2p 1/2         | 953.88                            | 954.68                                                            | /                              |
| Co <sup>2+</sup> 2p 3/2         | /                                 | 781.78                                                            | 782.48                         |
| Co <sup>2+</sup> 2p 1/2         | /                                 | 796.98                                                            | 797.88                         |
| Co <sup>3+</sup> 2p 3/2         | /                                 | 780.38                                                            | 780.48                         |
| Co <sup>3+</sup> 2p 1/2         | /                                 | 795.38                                                            | 796.58                         |



Table S3. OER performances of electrocatalysts in a 1.0 M KOH solution.

| Catalysts                                                         | Electrolyte | OER(mV)@<br>$j(\text{mA}/\text{cm}^2)$ | Tafel slope<br>( $\text{mV}\cdot\text{dec}^{-1}$ ) | References       |
|-------------------------------------------------------------------|-------------|----------------------------------------|----------------------------------------------------|------------------|
|                                                                   | 1.0 M KOH   | 263.1@10                               |                                                    |                  |
| <b>Ir<sub>26</sub>Cu<sub>74</sub></b>                             | 1.0 M KOH   | 283.1@20                               | <b>82.3</b>                                        | <b>This work</b> |
|                                                                   | 1.0 M KOH   | 328.2@50                               |                                                    |                  |
|                                                                   | 1.0 M KOH   | 264.9@10                               |                                                    |                  |
| <b>Ir<sub>19</sub>Cu<sub>81</sub>/Co<sub>3</sub>O<sub>4</sub></b> | 1.0 M KOH   | 282.1@20                               | <b>77.9</b>                                        | <b>This work</b> |
|                                                                   | 1.0 M KOH   | 310.9@50                               |                                                    |                  |
|                                                                   | 1.0 M KOH   | 255.9@10                               |                                                    |                  |
| <b>Ir<sub>26</sub>Cu<sub>74</sub>/Co<sub>3</sub>O<sub>4</sub></b> | 1.0 M KOH   | 268.1@20                               | <b>67.5</b>                                        | <b>This work</b> |
|                                                                   | 1.0 M KOH   | 287.1@50                               |                                                    |                  |
|                                                                   | 1.0 M KOH   | 256.1@10                               |                                                    |                  |
| <b>Ir<sub>32</sub>Cu<sub>68</sub>/Co<sub>3</sub>O<sub>4</sub></b> | 1.0 M KOH   | 271.1@20                               | <b>75.1</b>                                        | <b>This work</b> |
|                                                                   | 1.0 M KOH   | 296.5@50                               |                                                    |                  |
|                                                                   | 1.0 M KOH   | 296.0@10                               |                                                    |                  |
| Ir-Co <sub>3</sub> O <sub>4</sub> @NC                             | 1.0 M KOH   | 296.0@10                               | 89.0                                               | 3                |
| Pt <sub>3</sub> Rh-Co <sub>3</sub> O <sub>4</sub> /C              | 1.0 M KOH   | 290.0@10                               | 63.4                                               | 4                |
| 5-Ir-NCO                                                          | 1.0 M KOH   | 348.0@10                               | 103.0                                              | 5                |
| IrCo-N-C                                                          | 0.1 M KOH   | 330.0@10                               | 79.0                                               | 6                |
| Ir-TrEGO                                                          | 1.0 M KOH   | 338.0@10                               | 127.7                                              | 7                |
| IrO <sub>2</sub> @Ir-MOF                                          | 1.0 M KOH   | 283.0@10                               | 110.6                                              | 8                |

---

|                      |           |          |       |    |
|----------------------|-----------|----------|-------|----|
| IrCo NRAs            | 1.0 M KOH | 257.3@10 | 70.1  | 9  |
| IrO <sub>2</sub> /NF | 1.0 M KOH | 292.0@10 | 60.7  | 10 |
| Ir nanochains        | 1.0 M KOH | 340.0@10 | 125.0 | 11 |

---

Table S4. OER performances of noble metal based electrocatalysts in a 0.5 M H<sub>2</sub>SO<sub>4</sub> electrolyte.

| Catalysts                                                         | Electrolyte                          | OER(mV)@<br><i>j</i> (mA/cm <sup>2</sup> ) | Tafel slope<br>(mV·dec <sup>-1</sup> ) | References |
|-------------------------------------------------------------------|--------------------------------------|--------------------------------------------|----------------------------------------|------------|
| Ir <sub>26</sub> Cu <sub>74</sub>                                 | 0.5 M H <sub>2</sub> SO <sub>4</sub> | 387.0@10                                   | 296.4                                  | This work  |
|                                                                   | 0.5 M H <sub>2</sub> SO <sub>4</sub> | 434.9@20                                   |                                        |            |
| Ir <sub>19</sub> Cu <sub>81</sub> /Co <sub>3</sub> O <sub>4</sub> | 0.5 M H <sub>2</sub> SO <sub>4</sub> | 334.9@10                                   | 191.8                                  | This work  |
|                                                                   | 0.5 M H <sub>2</sub> SO <sub>4</sub> | 369.1@20                                   |                                        |            |
| Ir <sub>26</sub> Cu <sub>74</sub> /Co <sub>3</sub> O <sub>4</sub> | 0.5 M H <sub>2</sub> SO <sub>4</sub> | 293.0@10                                   | 165.3                                  | This work  |
|                                                                   | 0.5 M H <sub>2</sub> SO <sub>4</sub> | 317.1@20                                   |                                        |            |
| Ir <sub>32</sub> Cu <sub>68</sub> /Co <sub>3</sub> O <sub>4</sub> | 0.5 M H <sub>2</sub> SO <sub>4</sub> | 317.0@10                                   | 182.9                                  | This work  |
|                                                                   | 0.5 M H <sub>2</sub> SO <sub>4</sub> | 345.9@20                                   |                                        |            |
| IrO <sub>2</sub> /Co <sub>3</sub> O <sub>4</sub>                  | 0.5 M H <sub>2</sub> SO <sub>4</sub> | 452.0@10                                   | 114.4                                  | 12         |
| Ir <sub>1</sub> -Co <sub>3</sub> O <sub>4</sub> -NS-300           | 0.5 M H <sub>2</sub> SO <sub>4</sub> | 505.0@10                                   | 129.3                                  | 13         |
| IrCoO <sub>x</sub> @LLCF                                          | 0.1 M HClO <sub>4</sub>              | 286 ± 5@10                                 | 47.3 ± 2                               | 14         |
| IrO <sub>2</sub> @Co <sub>3</sub> O <sub>4</sub>                  | 0.5 M H <sub>2</sub> SO <sub>4</sub> | 301.0@10                                   | 72.1                                   | 15         |
| IrCoNi PHNCs                                                      | 0.5 M H <sub>2</sub> SO <sub>4</sub> | 309.0@10                                   | /                                      | 16         |
| Ir(20)/Fe@NCNT-900                                                | 0.5 M H <sub>2</sub> SO <sub>4</sub> | 300.0@10                                   | 64.5                                   | 17         |
| Rh <sub>22</sub> Ir <sub>78</sub>                                 | 0.5 M H <sub>2</sub> SO <sub>4</sub> | 300.0@10                                   | /                                      | 18         |
| HM-IrO <sub>2</sub>                                               | 0.5 M H <sub>2</sub> SO <sub>4</sub> | 312.0@10                                   | 61.2                                   | 19         |
| C-IrO <sub>2</sub>                                                | 0.5 M H <sub>2</sub> SO <sub>4</sub> | 308.0@10                                   | 87.7                                   | 20         |

---

Ir/G

0.5 M H<sub>2</sub>SO<sub>4</sub>

389.0@10

126.6

21

---

Table S5. ICP data of the Ir<sub>26</sub>Cu<sub>74</sub>/Co<sub>3</sub>O<sub>4</sub> post OER in alkaline and acidic conditions.

| Samples                                                                                                      | C <sub>Ir</sub> (mg/mL) | C <sub>Cu</sub> (mg/mL) | C <sub>Co</sub> (mg/mL) | Mole ration                       |
|--------------------------------------------------------------------------------------------------------------|-------------------------|-------------------------|-------------------------|-----------------------------------|
| Ir <sub>26</sub> Cu <sub>74</sub> /Co <sub>3</sub> O <sub>4</sub><br>(1.0 M KOH)                             | 0.885                   | 0.036                   | 2.845                   | Ir <sub>89</sub> Cu <sub>11</sub> |
| Ir <sub>26</sub> Cu <sub>74</sub> /Co <sub>3</sub> O <sub>4</sub><br>(0.5 M H <sub>2</sub> SO <sub>4</sub> ) | 0.950                   | 0.031                   | 3.367                   | Ir <sub>91</sub> Cu <sub>9</sub>  |

## References

1. Q. Zhang, W. Zhang, J. Zhu, X. Zhou, G. -R. Xu, D. Chen, Z. Wu, L. Wang, *Adv. Energy Mater.*, 2023, 2304546.
2. J. Chen, Y. Ma, T. Huang, T. Jiang, S. Park, J. Xu, X. Wang, Q. Peng, S. Liu, G. Wang, W. Chen, *Adv. Mater.*, 2023, 2312369.
3. S. Jung, R. A. Senthil, C. J. Moon, N. Tarasenko, A. Min, S. J. Lee, N. Tarasenko, M. Y. Choi, *Chem. Eng. J.*, 2023, 143717468.
4. N. Bhuvanendran, C. W. Park, H. Su, S. Y. Lee, *Environ. Res.*, 2023, 115950229.
5. H. -J. Lee, D. -H. Park, W. -J. Lee, S. -B. Han, M. -H. Kim, J. -H. Byeon, K. -W. Park, *Appl. Catal. A: Gen.*, 2021, 118377626.
6. M. Xiao, J. Zhu, S. Li, G. Li, W. Liu, Y. -P. Deng, Z. Bai, L. Ma, M. Feng, T. Wu, D. Su, J. Lu, A. Yu, Z. Chen, *ACS Catal.*, 2021, 8837-884611.
7. X. Li, J. Cao, J. Chen, Y. Zhu, H. Xia, Z. Xu, C. Gu, J. Xie, M. Jones, C. Lyu, J. Corbin, X. Li, W. Hu, *Adv. Funct. Mater.*, 2024, 231353034.
8. L. Li, G. Li, Y. Zhang, W. Ouyang, H. Zhang, F. Dong, X. Gao, Z. Lin, *J. Mater. Chem. A*, 2020, 25687-256958.
9. Y. Zhang, G. Zhang, M. Zhang, X. Zhu, P. Shi, S. Wang, A. -L. Wang, *Chem. Eng. J.*, 2022, 133577433.
10. S. Hong, K. Ham, J. Hwang, S. Kang, M. H. Seo, Y. -W. Choi, B. Han, J. Lee, K. Cho, *Adv. Funct. Mater.*, 2023, 220954333.
11. Z. Liu, J. Li, J. Zhang, M. Qin, G. Yang, Y. Tang, *ChemCatChem*, 2020, 3060-306712.
12. K. Hua, R. Ding, X. Duan, Z. Rui, X. Li, Y. Wu, D. Yang, J. Li, J. Liu, *ACS Appl. Nano Mater.*, 2024, 487-4977.
13. Y. Liu, Y. Chen, X. Mu, Z. Wu, X. Jin, J. Li, Y. Xu, L. Yang, X. Xi, H. Jang, Z. Lei, Q. Liu, S. Jiao, P. Yan, X. Li, R. Cao, *ACS Catal.*, 2023, 3757-376713.
14. L. Chong, J. Wen, E. Song, Z. Yang, I. D. Bloom, W. Ding, *Adv. Energy Mater.*, 2023, 230230613.
15. W. Han, Y. Qian, F. Zhang, Y. He, P. Li, X. Zhang, *Chem. Eng. J.*, 2023, 145353473.
16. J. Feng, F. Lv, W. Zhang, P. Li, K. Wang, C. Yang, B. Wang, Y. Yang, J. Zhou, F. Lin, G. -C. Wang, S. Guo, *Adv. Mater.*, 2017, 170379829.
17. Z. Zhang, Y. Xia, M. Ye, D. Wen, W. Zhang, W. Peng, L. Tian, W. Hu, *Int. J. Hydrog. Energy*, 2022, 13371-1338547.
18. Z. Liu, Z. Kong, S. Cui, L. Liu, F. Wang, Y. Wang, S. Wang, S. -Q. Zang, *Small*, 2023, 230221619.
19. J. Wu, W. Zou, J. Zhang, L. Zhang, H. Song, Z. Cui, L. Du, *Small*, 2024, 230841920.
20. H. Yu, F. Liao, W. Zhu, K. Qin, J. Shi, M. Ma, Y. Li, M. Fang, J. Su, B. Song, L. Li, R.R. Zairov, Y. Ji, M. Shao, Q. Shao, *ChemCatChem*, 2023, e20230073715.
21. S. Zhang, L. Yin, Q. Li, S. Wang, W. Wang, Y. Du, *Chem. Sci.*, 2023, 5887-589314.
